# Supplementary material for: Technical note: Update on response times, in-air measurements, and in situ drift for oxygen optodes on profiling platforms
Source: Copernicus journal article supplement (doi:10.5194/os-13-1-2017), 2017-01-13
Supplement: Supplementary file 1 [file os-13-1-2017-supplement.zip]

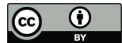

## *Supplement of*

# **Technical note: Update on response times, in-air measurements, and in situ drift for oxygen optodes on profiling platforms**

**Henry C. Bittig and Arne Körtzinger**

*Correspondence to:* Henry C. Bittig ([bittig@obs-vlfr.fr](mailto:bittig@obs-vlfr.fr))

- [os-13-1-2017-supplement-title-page.pdf](#)
- [T\\_IL\\_tau\\_3830\\_4330.dat](#)
- [T\\_IL\\_tau\\_4330F.dat](#)
- [T\\_IL\\_tau\\_SBE63.dat](#)

The copyright of individual parts of the supplement might differ from the CC-BY 3.0 licence.
